# Supplementary material for: A novel NOX2 inhibitor attenuates human neutrophil oxidative stress and ameliorates inflammatory arthritis in mice
Source: PubMed Central journal article supplement — Redox Biol. 2019 Jul 10;26:101273. doi: 10.1016/j.redox.2019.101273 (PMC6639650; doi:10.1016/j.redox.2019.101273), 2019-07-10

**A novel NOX2 inhibitor attenuates human neutrophil oxidative stress and ameliorates inflammatory arthritis in mice**

Fu-Chao Liu<sup>a,b,1</sup>, Huang-Ping Yu<sup>a,b,1</sup>, Po-Jen Chen<sup>c,1</sup>, Hsuan-Wu Yang<sup>d,1</sup>, Shih-Hsin Chang<sup>d,e</sup>, Cherng-Chyi Tzeng<sup>f,g</sup>, Wei-Jen Cheng<sup>h,i</sup>, You-Ren Chen<sup>f,g</sup>, Yeh-Long Chen<sup>f,g,\*</sup>, Tsong-Long Hwang<sup>b,d,e,j,k,\*\*</sup>

<sup>a</sup>College of Medicine, Chang Gung University, Taoyuan 333, Taiwan.

<sup>b</sup>Department of Anesthesiology, Chang Gung Memorial Hospital, Taoyuan 333, Taiwan.

<sup>c</sup>Department of Cosmetic Science, Providence University, Taichung 433, Taiwan

<sup>d</sup>Graduate Institute of Natural Products, College of Medicine, Chang Gung University, Taoyuan 333, Taiwan.

<sup>e</sup>Research Center for Chinese Herbal Medicine, Research Center for Food and Cosmetic Safety, and Graduate Institute of Health Industry Technology, College of Human Ecology, Chang Gung University of Science and Technology, Taoyuan 333, Taiwan

<sup>f</sup>Department of Medicinal and Applied Chemistry, College of Life Science, Kaohsiung Medical University, Kaohsiung 807, Taiwan

<sup>g</sup>Department of Medical Research, Kaohsiung Medical University-Hospital, Kaohsiung 807, Taiwan

<sup>h</sup>Graduate Institute of Clinical Medicine, College of Medicine, Chang Gung University, Taoyuan 333, Taiwan.

<sup>i</sup>Department of Traditional Chinese Medicine, Center of Traditional Chinese Medicine, Chang Gung Memorial Hospital, Taoyuan 333, Taiwan.

<sup>j</sup>Chinese Herbal Medicine Research Team, Healthy Aging Research Center, Chang Gung University, Taoyuan 333, Taiwan

<sup>k</sup>Department of Chemical Engineering, Ming Chi University of Technology, New Taipei City 243, Taiwan

\*Correspondence author. Department of Medicinal and Applied Chemistry, College of Life Science, Kaohsiung Medical University, Kaohsiung 807, Taiwan. E-mail: yeloch@kmu.edu.tw

\*\*Correspondence author. Graduate Institute of Natural Products, College of Medicine, Chang Gung University, Taoyuan 333, Taiwan. E-mail: htl@mail.cgu.edu.tw

<sup>l</sup>These authors contributed equally to this work.

## Supplementary Materials and Methods

### 1.1. Synthesis of CYR5099

A mixture of 1-methyl-1*H*-benzo[*f*]indole-4,9-dione (**A**, Mp: 188-190 °C. (lit. 191-192 °C), 0.42 g, 2.0 mmol) [1] and hydroxylamine hydrochloride (0.70 g, 10.0 mmol) in EtOH (10 mL) was refluxed for 36 h. After cooling, the reaction mixture was poured into ice water. The crude product was filtered, washed with ice water and crystallized from EtOH to give 4-(Hydroxyimino)-1-methyl-1*H*-benzo[*f*]indol-9(4*H*)-one (**B**) (0.35 g, 78% yield). Mp: 217-219 °C. IR (KBr): 3308, 1629, 1604, 1583, 1413, 1263, 1197, 695 cm<sup>-1</sup>. <sup>1</sup>H NMR (400 MHz, DMSO-*d*<sub>6</sub>): δ 4.08 (s, 3H, NMe), 7.17 (d, 1H, *J* = 2.4 Hz, ArH), 7.39 (m, 1H, ArH), 7.57-7.61 (m, 1H, ArH), 7.63-7.67 (m, 1H, ArH), 8.13-8.15 (m, 1H, ArH), 8.26-8.29 (m, 1H, ArH), 12.66 (s, 1H, NOH). <sup>13</sup>C NMR (400 MHz, DMSO-*d*<sub>6</sub>): δ 36.48, 110.87, 121.23, 123.23, 125.68, 126.23, 128.86, 131.37, 131.87, 132.59, 134.05, 141.52, 174.30. Anal. Calcd for C<sub>13</sub>H<sub>10</sub>N<sub>2</sub>O<sub>2</sub>: C, 69.01; H, 4.46; N, 12.38. Found: C, 69.05; H, 4.55; N, 12.30.

A mixture of **B** (0.23 g, 1.0 mmol) and sodium hydride (60% in oil, 0.12 g, 3.0 mmol) in dry DMF (8.0 mL) was stirred at room temperature for 15 min, then 1,4-dibromobutane (0.86 g, 4.0 mmol) was added. After 15 min, the dimethylamine (40% in water, 3 mL) was added, and the reaction mixture was stirred for 15 min. The solvent was removed in *vecuo* and the residue was extracted with water and CH<sub>2</sub>Cl<sub>2</sub> three times. The organic layer evaporated in *vecuo* and purified by column chromatography, using a gradient eluant (MeOH/CH<sub>2</sub>Cl<sub>2</sub>, 1/10 to 1/5) in 77% yield as a white solid (**CYR5099**). Mp: 173-175 °C. IR (KBr): 1637, 1601, 1411, 1271, 980, 781, 689 cm<sup>-1</sup>. <sup>1</sup>H NMR (400 MHz, CDCl<sub>3</sub>): δ 1.94-2.00 (m, 2H, OCH<sub>2</sub>CH<sub>2</sub>CH<sub>2</sub>CH<sub>2</sub>N), 2.06-2.14 (m, 2H, OCH<sub>2</sub>CH<sub>2</sub>CH<sub>2</sub>CH<sub>2</sub>N), 2.77 (s, 6H, N(CH<sub>3</sub>)<sub>2</sub>), 3.08-3.12 (m, 2H, OCH<sub>2</sub>CH<sub>2</sub>CH<sub>2</sub>CH<sub>2</sub>N), 4.12 (s, 3H, NCH<sub>3</sub>), 4.47 (t, 2H, *J* = 5.6 Hz,

OCH<sub>2</sub>CH<sub>2</sub>CH<sub>2</sub>CH<sub>2</sub>N), 6.99 (d, 1H, *J* = 2.4 Hz, ArH), 7.07 (d, 1H, *J* = 2.8 Hz, ArH), 7.50-7.58 (m, 2H, ArH), 8.22-8.25 (m, 1H, ArH), 8.28-8.31 (m, 1H, ArH). <sup>13</sup>C NMR (100 MHz, CDCl<sub>3</sub>): δ 21.29, 26.46, 36.98, 42.81 (2C), 57.74, 74.41, 111.38, 121.34, 123.73, 126.17, 127.10, 129.14, 131.44, 131.74, 131.90, 133.70, 142.54, 175.58. Anal. Calcd for C<sub>19</sub>H<sub>23</sub>N<sub>3</sub>O<sub>2</sub> · 0.9 HBr · 0.1 H<sub>2</sub>O: C, 55.89; H, 5.96; N, 10.30. Found: C, 55.69; H, 5.96; N, 10.22.

### *1.2. Preparation of cultured cells*

The human promyelocytic leukemic HL-60 cells were purchased from ATCC. The colorectal adenocarcinoma HT-29 cell was a kind gift from Dr. Tzu-Hao Wang (Chang Gung Memorial Hospital). HL-60 and HT-29 cells were respectively cultured in RPMI 1640 medium supplemented with 20% and 10% fetal bovine serum (FBS) and 1× Antibiotic-Antimycotic. Both cells were grown in a humidified atmosphere at 37°C with 5% CO<sub>2</sub>. HL-60 cells were differentiated as neutrophil-like cells by a 5-day treatment with 1.3% DMSO in the growth medium (dHL-60 cells) [2].

### *1.3. Lentivirus infection*

Viral supernatants of shRNA against p47<sup>phox</sup> or luciferase were obtained from RNAi core (Academia Sinica, Taiwan). After plating HL-60 cells (1 × 10<sup>6</sup>) in 1 ml in a 6-well plate, viral supernatants were added to each well, followed by centrifugation at 1,000g for 1 h. Transfected cells were cultured at 37°C for 12 h and then incubated in growth medium containing puromycin (2 µg/ml) for a further 7 days.

### *1.4. Measurement of intracellular O<sub>2</sub><sup>•-</sup> generation*

The measurement of intracellular O<sub>2</sub><sup>•-</sup> generation was previously described [3].

The levels of 2-hydroxyethidium (2-OH-E<sup>+</sup>) were determined by high-performance liquid chromatography–mass spectrometry (HPLC–MS).

#### *1.5. Assays of NADPH oxidase 1 (NOX1)-dependent ROS generation*

The NOX1-dependent ROS generation was measured using luminol in HT-29 cells, which highly expressed NOX1 but not other NOX types [4, 5]. HT-29 cells ( $7 \times 10^5$  cells/ml) were pretreated with DMSO, CYR5099, DPI, or apocynin for 5 min and then incubated with 37.5  $\mu$ M luminol in the presence of 6 U/ml horseradish peroxidase at 37°C.

#### *1.6. Fractionation of plasma membrane proteins*

Cells ( $1 \times 10^8$ ) were homogenized in 2 ml of the Homogenization Buffer Mix on ice for 30-50 times. The isolation of plasma membrane proteins was performed using the Plasma Membrane Protein Extraction Kit (BioVision, CA, USA) according to the manufacturer's protocol.

#### *1.7. Homology remodeling of human gp91<sup>phox</sup>*

The human gp91<sup>phox</sup> protein sequence was from Uniprot protein database (Uniprot\_P04839). The crystal structures of C-terminal human gp91<sup>phox</sup> and FAD-binding region of *C. stagnale* gp91<sup>phox</sup> were obtained from Protein Data Bank (PDB 3A1F and 5O0X, respectively). Partial human gp91<sup>phox</sup> structure from S291 to F570 was modelled using MODELLER (Dassault Systèmes BIOVIA, Discovery Studio Modeling Environment, Release 2018, San Diego: Dassault Systèmes, 2016). The best model was chosen according to the discrete optimised protein energy score that was verified by measuring the compatibility score of each residue in the given 3D

environment and then checked using Ramachandron plot and LOOPER. The final model was used in molecular docking studies.

## References

- [1] Y.L. Wu, C.P. Chuang, P.Y. Lin, Oxidative free radical reactions between 2-amino-1,4-naphthoquinones and carbonyl compounds, *Tetrahedron* 57(26) (2000) 5543-49.
- [2] P.J. Chen, I.L. Ko, C.L. Lee, H.C. Hu, F.R. Chang, Y.C. Wu, Y.L. Leu, C.C. Wu, C.Y. Lin, C.Y. Pan, Y.F. Tsai, T.L. Hwang, Targeting allosteric site of AKT by 5,7-dimethoxy-1,4-phenanthrenequinone suppresses neutrophilic inflammation, *EBioMedicine* 40 (2019) 528-540.
- [3] Y.F. Tsai, H.P. Yu, P.J. Chung, Y.L. Leu, L.M. Kuo, C.Y. Chen, T.L. Hwang, Osthonol attenuates neutrophilic oxidative stress and hemorrhagic shock-induced lung injury via inhibition of phosphodiesterase 4, *Free Radic Biol Med* 89 (2015) 387-400.
- [4] D. Gianni, B. Bohl, S.A. Courtneidge, G.M. Bokoch, The involvement of the tyrosine kinase c-Src in the regulation of reactive oxygen species generation mediated by NADPH oxidase-1, *Molecular biology of the cell* 19(7) (2008) 2984-94.
- [5] D. Gianni, N. Taulet, H. Zhang, C. DerMardirossian, J. Kister, L. Martinez, W.R. Roush, S.J. Brown, G.M. Bokoch, H. Rosen, A novel and specific NADPH oxidase-1 (Nox1) small-molecule inhibitor blocks the formation of functional invadopodia in human colon cancer cells, *ACS chemical biology* 5(10) (2010) 981-93.

## Supplementary Figure Legends

### **Supplementary Fig. 1. The synthetic process of CYR5099.**

**Supplementary Fig. 2. Remodeling of human gp91<sup>phox</sup>** (A) Superimpose of gp91<sup>phox</sup> templates (green: 3A1F, yellow: 5O0X). The RMSD value is 1.1704 Å. (B) The remodeling structure of human gp91<sup>phox</sup> with FAD-binding region.

**Supplementary Fig. 3. CYR5099 inhibits superoxide anion generation in activated human neutrophils.** (A) 2-Hydroethidine-labeled human neutrophils were incubated with DMSO or CYR5099 (1-10 µM) for 5 min and then activated with fMLF (0.1 µM)/CB (1 µg/ml) for another 5 min. 2-OH-E<sup>+</sup> production was determined by HPLC–MS. All data are shown as the mean ± S.E.M. (n = 3). \*\**p* < 0.05; \*\*\**p* < 0.001. (B) The representative chromatograms.

**Supplementary Fig. 4. CYR5099 inhibits the zymosan A-induced ROS generation in human neutrophils.** Human neutrophils were incubated with DMSO or CYR5099 (5 or 10 µM) for 5 min before stimulation with zymosan A (250 µg/ml). Luminol was used to detect total ROS. Chemiluminescence levels were calculated and data are shown as the mean ± S.E.M. (n = 3). \*\*\**p* < 0.001.

**Supplementary Fig. 5. CYR5099 does not show cytotoxicity.** Human neutrophils were incubated with DMSO or CYR5099 (5-15  $\mu$ M) for 5 min and then activated with (A) fMLF (0.1  $\mu$ M)/CB (1  $\mu$ g/ml) or (B) PMA (10 nM) for another 10 min. (C) Human neutrophils were pretreated with PMA (10 nM) for 5 min and then incubated with DMSO or CYR5099 (10 or 15  $\mu$ M) for another 10 min. LDH release was expressed as percentage of enzyme liberated by incubation with 0.1% Triton X-100. All data are expressed as the mean  $\pm$  S.E.M. (n = 3).

**Supplementary Fig. 6. CYR5099 does not inhibit p47<sup>phox</sup> translocation in human neutrophils.** Human neutrophils were incubated with DMSO or CYR5099 (5 or 10  $\mu$ M) for 5 min, and then activated PMA (10 nM). (A) Total cell lysates and plasma membrane lysates were assayed by Western blot using antibodies against total or phosphorylated p47<sup>phox</sup>. (B) The membrane-bound p47<sup>phox</sup> or phosphorylation of p47<sup>phox</sup> were quantified expressed as a relative ratio (fold of PMA alone).

**Supplementary Fig. 7. CYR5099 does not inhibit NOX1-dependent ROS generation in HT-29 cells.** HT-29 cells were incubated with DMSO, (A) CYR5099 (5 or 10  $\mu$ M), (B) DPI (0.3 or 3  $\mu$ M), or (C) apocynin (10 or 30  $\mu$ M) for 5 min. Luminol



was used to detect total ROS. Chemiluminescence levels were calculated and data are shown as the mean  $\pm$  S.E.M. (n = 3). \*\*\* $p$  < 0.001.

**Supplementary Fig. 8. CYR5099 does not show further inhibitory effect on PMA-activated superoxide anion generation in p47<sup>phox</sup>-knockdown dHL-60 cells.**

(A) The levels of p47<sup>phox</sup> and GAPDH in sh-control and sh-p47<sup>phox</sup> dHL-60 cells were assayed by Western blot. (B) Sh-control or sh-p47<sup>phox</sup> dHL-60 cells were incubated with DMSO or CYR5099 (5 or 10  $\mu$ M) for 5 min and then activated with PMA (10 nM). Ferricytochrome c reduction was monitored by a spectrophotometer at 550 nm.

All data are expressed as mean  $\pm$  S.E.M. (n = 3). \*\* $p$  < 0.01; \*\*\* $p$  < 0.001; n.s. (no significance).

Supplementary Fig. 1

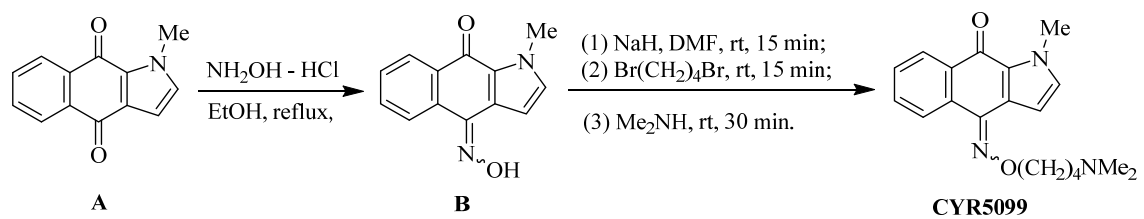

Supplementary Fig. 2

(A)

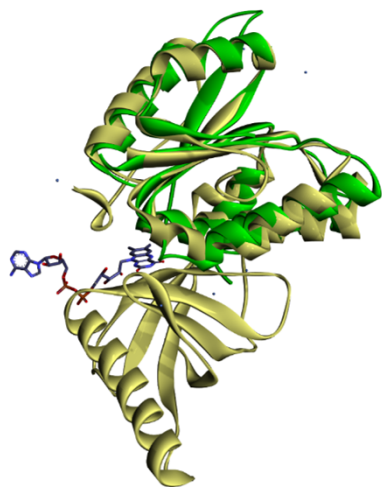

(B)

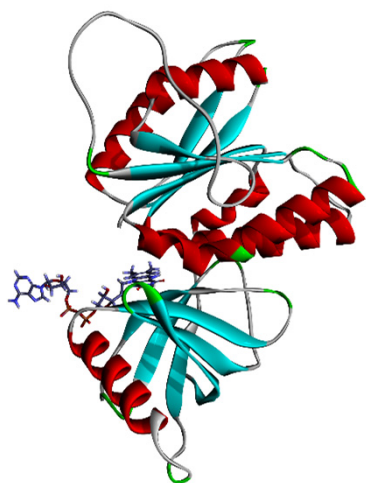

Supplementary Fig. 3

(A)

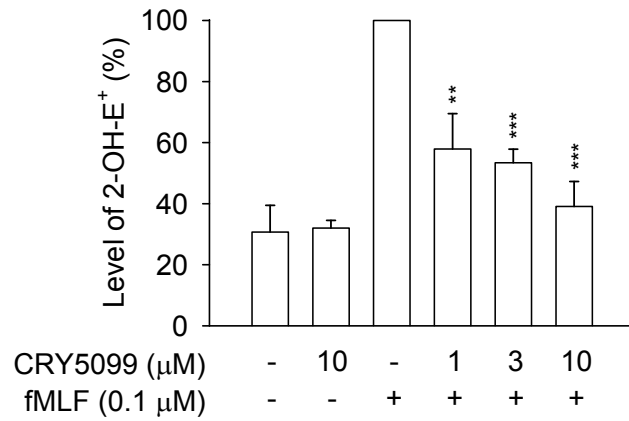

(B)

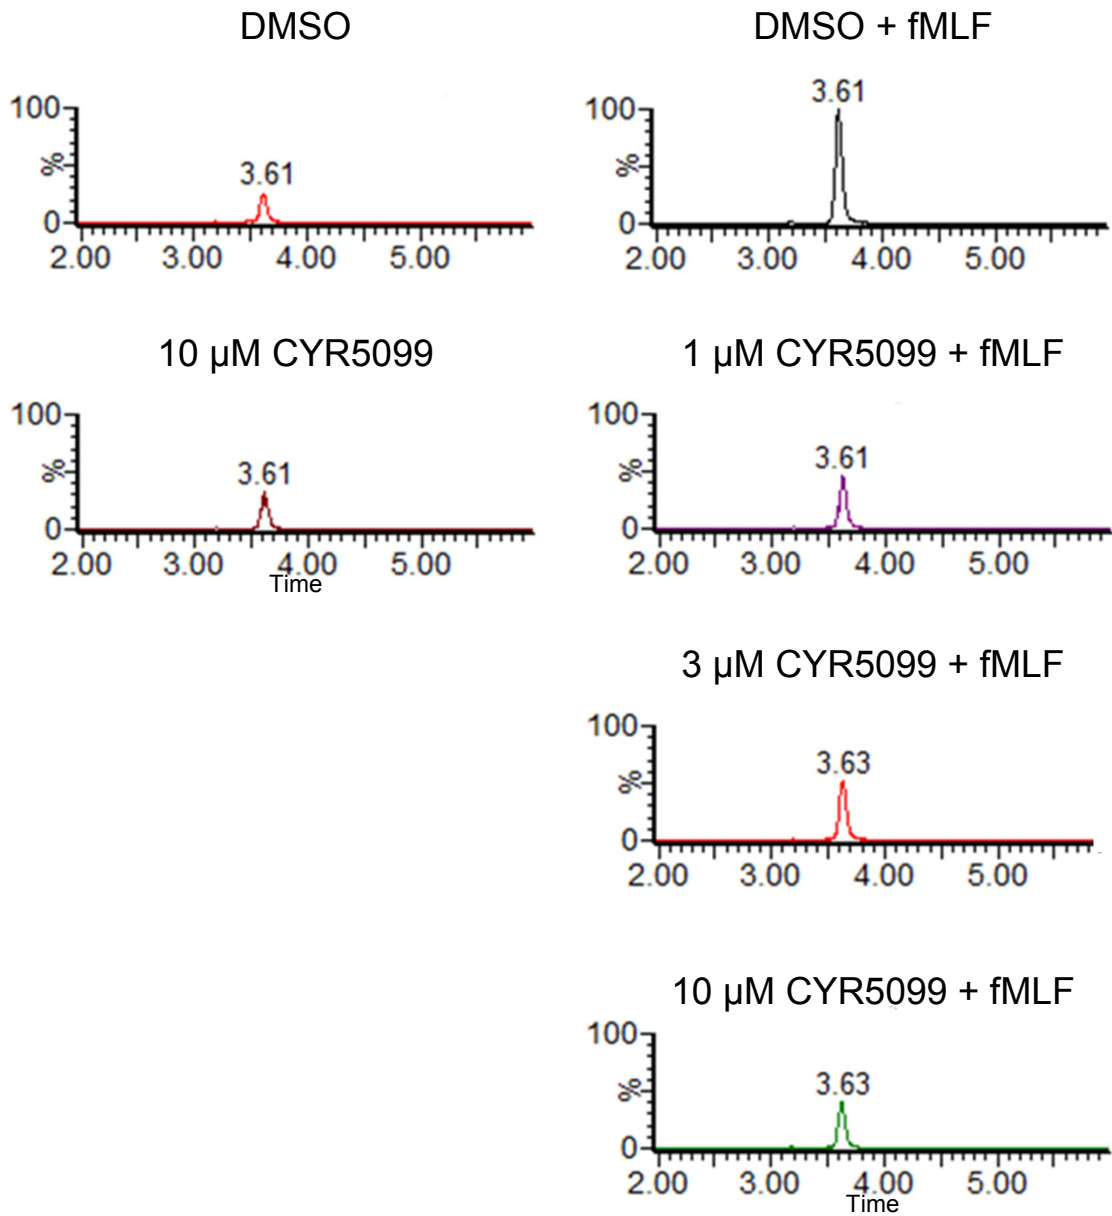

Supplementary Fig. 4

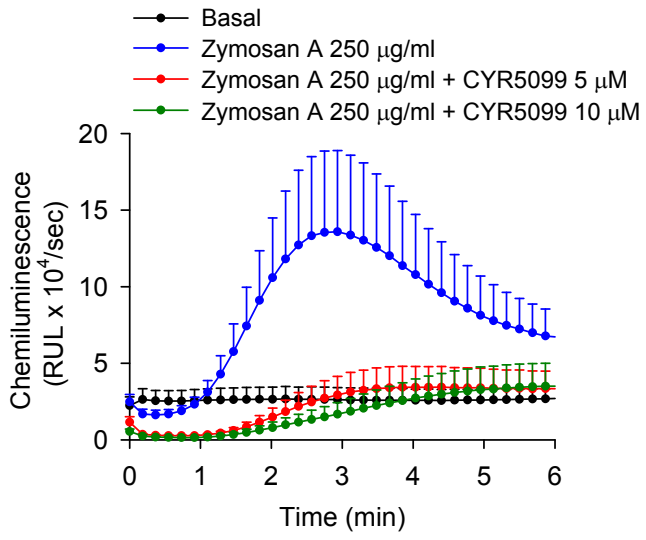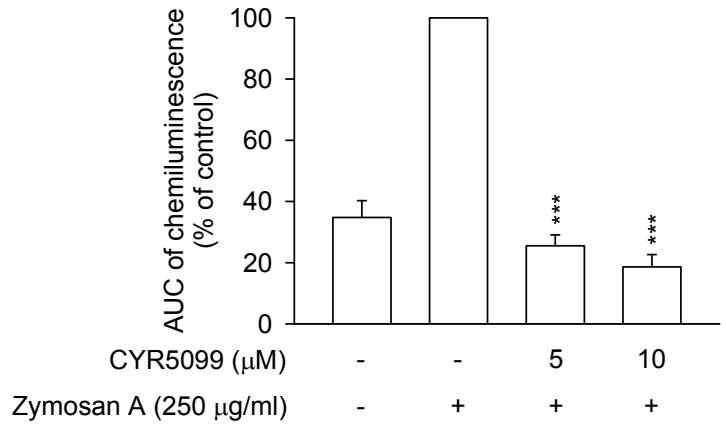

Supplementary Fig. 5

(A)

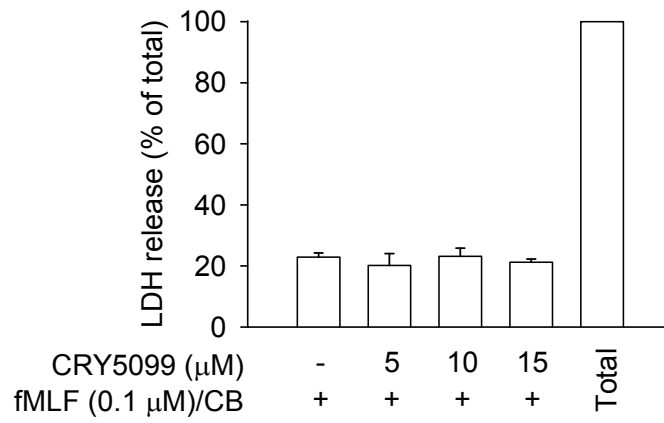

(B)

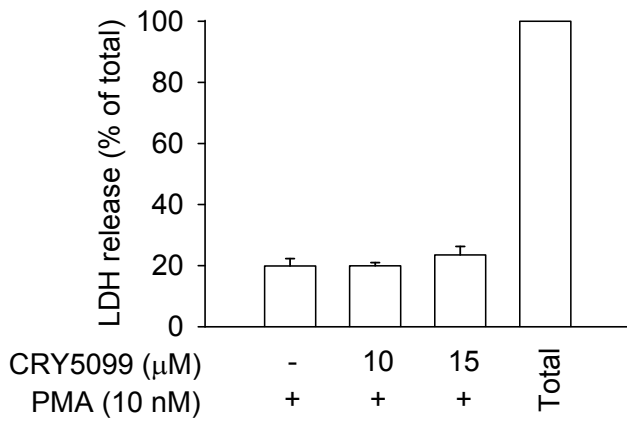

(C)

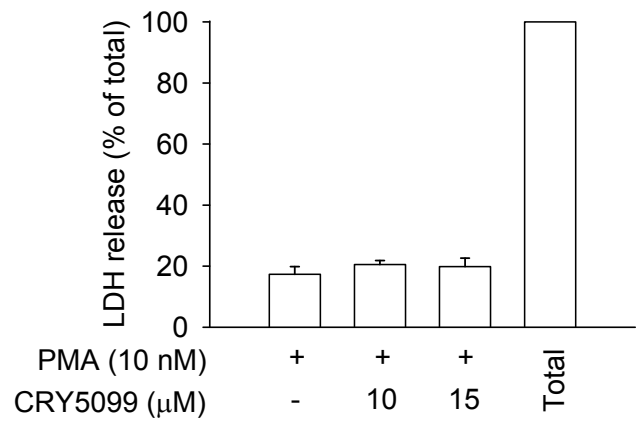

Supplementary Fig. 6

(A)

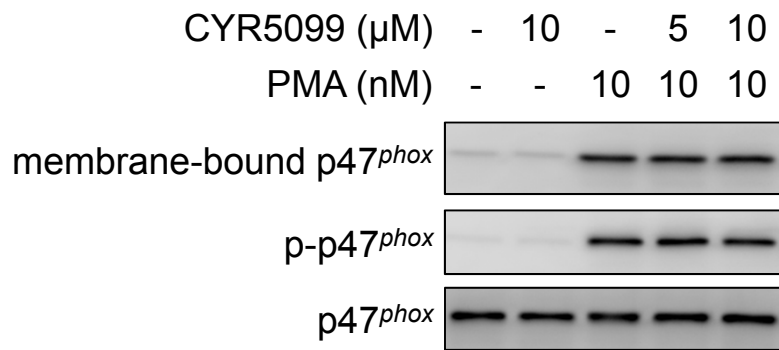

(B)

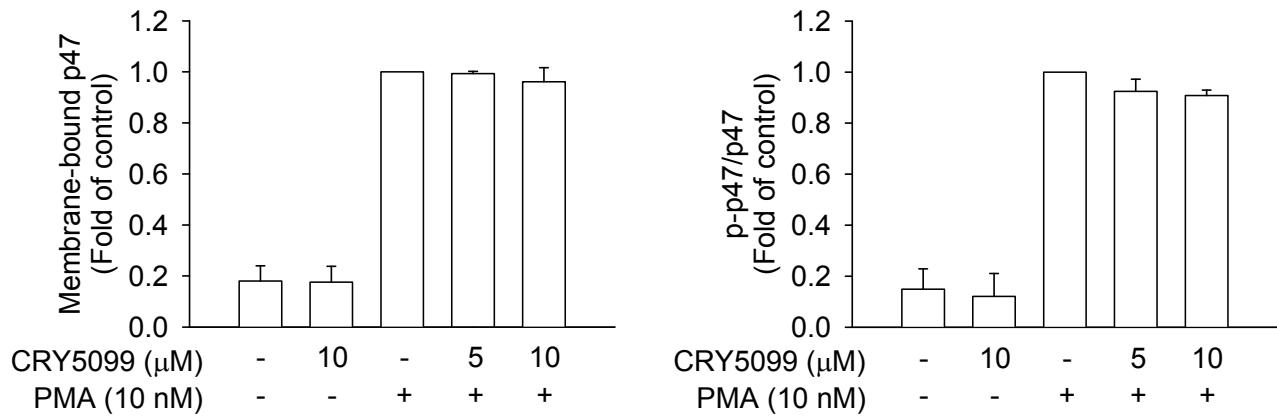

# Supplementary Fig. 7

(A)

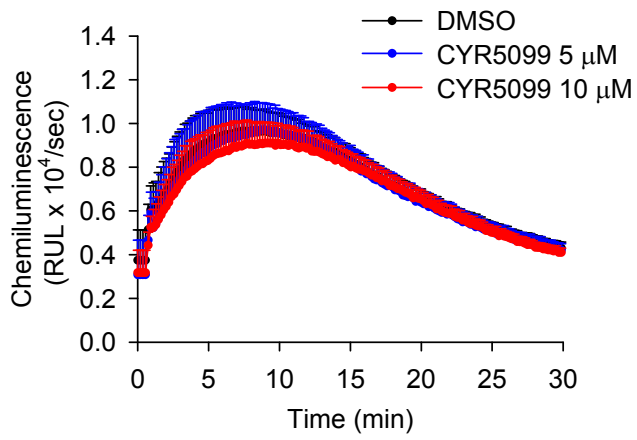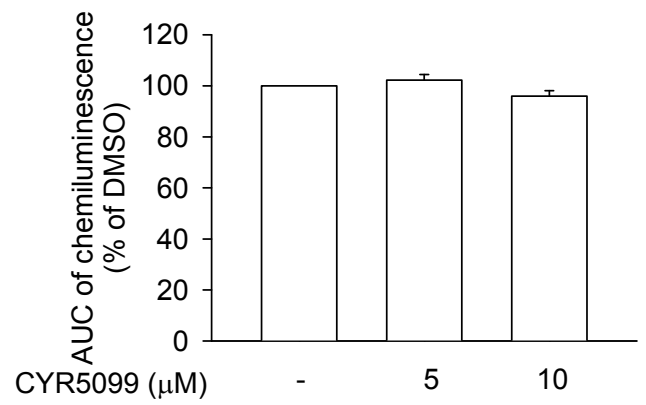

(B)

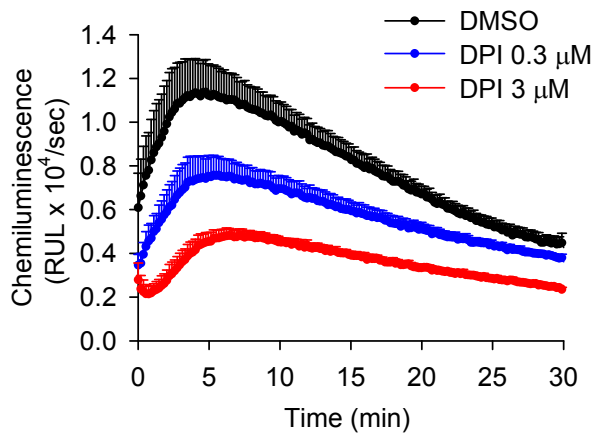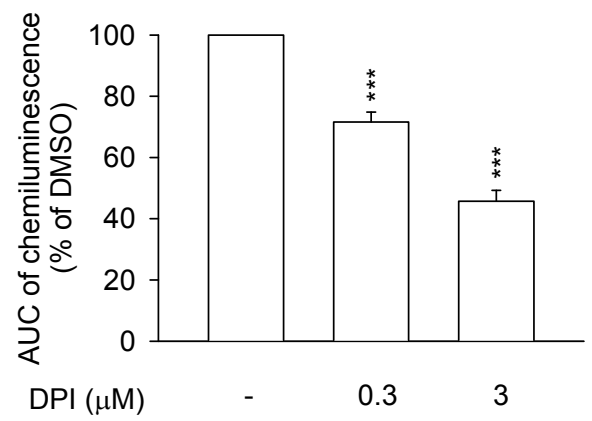

(C)

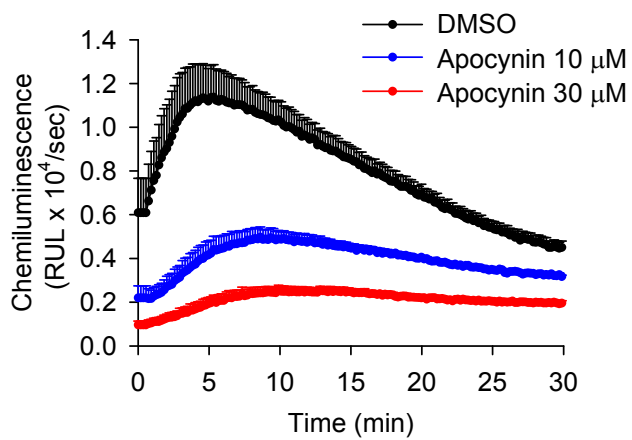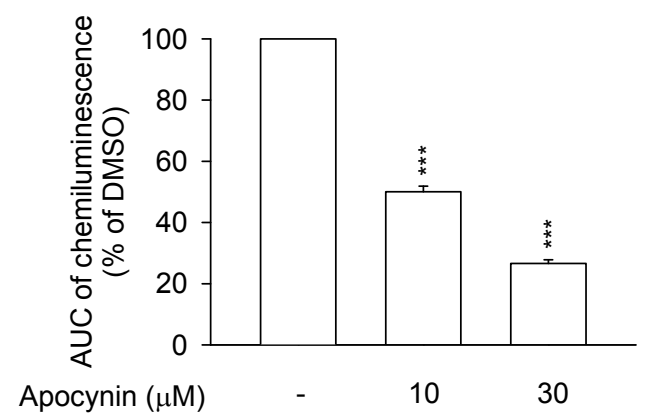



Supplementary Fig. 8

(A)

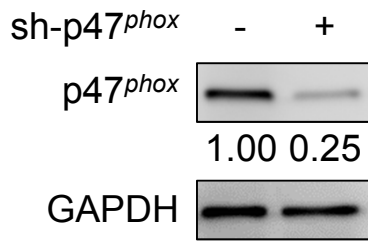

(B)

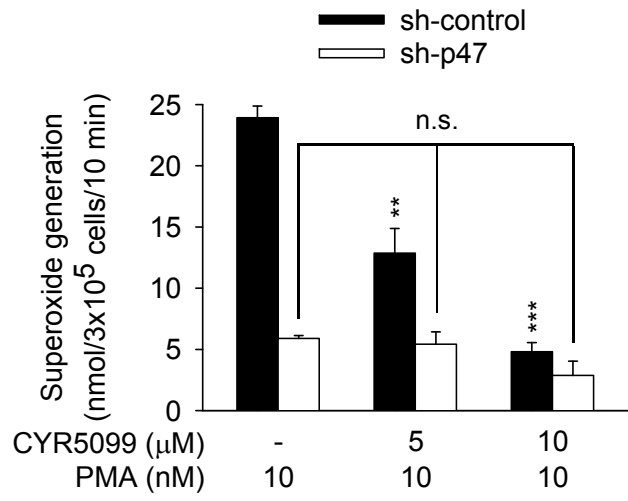

Supplement: mmc1.pdf [file mmc1.pdf]
